# Supplementary material
Source: ML conference proceedings conference paper supplement (https://proceedings.neurips.cc/paper_files/paper/2015/hash/96b9bff013acedfb1d140579e2fbeb63-Abstract.html)
Supplement: Supplementary file [file 96b9bff013acedfb1d140579e2fbeb63-Supplemental.zip]

## Appendix

### 4.1 Proof of Lemma 2.2

**Proof.** First note that  $g(x)$  being convex quadratic implies that its second order Taylor expansion is tight

$$g(x^*) - g(x^{(r+1)}) = \langle \nabla g(x^{(r+1)}), x^* - x^{(r+1)} \rangle + \frac{1}{2} \|A(x^{(r+1)} - x^*)\|^2. \quad (33)$$

Using this fact we can estimate  $f(x^{(r+1)}) - f(x^*)$  by the following series of inequalities

$$\begin{aligned} f(x^{(r+1)}) - f(x^*) &= \langle \nabla g(x^{(r+1)}), x^{(r+1)} - x^* \rangle + h(x^{(r+1)}) - h(x^*) - \frac{1}{2} \|A(x^{(r+1)} - x^*)\|^2 \\ &\stackrel{(i)}{\leq} \sum_{k=1}^K \left\langle \nabla_k g(x^{(r+1)}) - \nabla_k g(w_k^{(r+1)}), x_k^{(r+1)} - x_k^* \right\rangle - \sum_{k=1}^K P_k \left\langle x_k^{(r+1)} - x_k^{(r)}, x_k^{(r+1)} - x_k^* \right\rangle - \frac{1}{2} \|A(x^{(r+1)} - x^*)\|^2 \\ &= \sum_{k=1}^K \left\langle \left( \sum_{j \geq k} A_j (x_j^{(r+1)} - x_j^{(r)}) \right), A_k (x_k^{(r+1)} - x_k^*) \right\rangle - (x^{(r+1)} - x^{(r)})^T (\tilde{P} \otimes I_N) (x^{(r+1)} - x^*) \\ &\quad - \frac{1}{2} \|A(x^{(r+1)} - x^*)\|^2 \\ &= (x^{(r+1)} - x^{(r)})^T \tilde{A}^T (D_1 \otimes I_M) \tilde{A} (x^{(r+1)} - x^*) - (x^{(r+1)} - x^{(r)})^T (\tilde{P} \otimes I_N) (x^{(r+1)} - x^*) \\ &\quad - \frac{1}{2} \|A(x^{(r+1)} - x^*)\|^2 \\ &\leq (x^{(r+1)} - x^{(r)})^T \left( \tilde{A}^T (D_1 \otimes I_M) \tilde{A} - \tilde{P} \otimes I_N \right) (x^{(r+1)} - x^*) \end{aligned} \quad (34)$$

where in (i) we have used the optimality condition of the subproblem (9) (i.e., (11)); in the last equality we have defined a lower triangular matrix  $D_1$

$$D_1 := \begin{bmatrix} 1 & 0 & 0 & \cdots & 0 & 0 \\ 1 & 1 & 0 & \cdots & 0 & 0 \\ 1 & 1 & 1 & \cdots & 0 & 0 \\ \vdots & \vdots & \vdots & \cdots & \vdots & \vdots \\ 1 & 1 & 1 & \cdots & 1 & 1 \end{bmatrix} \in \mathbb{R}^{K \times K}. \quad (35)$$

Notice that the following is true

$$\tilde{A}^T (D_1 \otimes I_M) \tilde{A} = \left( A^T A - \tilde{A}^T \tilde{A} \right) \odot D_2 + \tilde{A}^T \tilde{A},$$

where “ $\odot$ ” denotes the Hadamard product;  $D_2$  is a lower triangular matrix similarly as defined in (35), but of dimension  $KN \times KN$ . Combining this identity and (34), we have

$$\begin{aligned} \Delta^{(r+1)} &\leq \left( (x^{(r+1)} - x^{(r)}) (\tilde{P}^{1/2} \otimes I_N) \right)^T \left( (\tilde{P}^{-1/2} \otimes I_N) (A^T A - \tilde{A}^T \tilde{A}) \odot D_2 \right. \\ &\quad \left. + (\tilde{P}^{-1/2} \otimes I_N) \tilde{A}^T \tilde{A} - \tilde{P}^{1/2} \otimes I_N \right) (x^{(r+1)} - x^*) \\ &\stackrel{(i)}{\leq} \left\| (x^{(r+1)} - x^{(r)}) (\tilde{P}^{1/2} \otimes I_N) \right\| \left\| (\tilde{P}^{-1/2} \otimes I_N) (A^T A - \tilde{A}^T \tilde{A}) \odot D_2 \right\| \|x^{(r+1)} - x^*\| \\ &\stackrel{(ii)}{\leq} \left\| (x^{(r+1)} - x^{(r)}) (\tilde{P}^{1/2} \otimes I_N) \right\| \left\| (\tilde{P}^{-1/2} \otimes I_N) (A^T A - \tilde{A}^T \tilde{A}) \right\| \left( 1 + \frac{1}{\pi} + \frac{\log(NK)}{\pi} \right) R_0 \\ &\stackrel{(iii)}{\leq} R_0 \left\| (x^{(r+1)} - x^{(r)}) (\tilde{P}^{1/2} \otimes I_N) \right\| \left\| (\tilde{P}^{-1/2} \otimes I_N) (A^T A - \tilde{A}^T \tilde{A}) \right\| \log(2NK) \\ &\leq R_0 \log(2NK) \left( L/\sqrt{P_{\min}} + \sqrt{P_{\max}} \right) \left\| (x^{(r+1)} - x^{(r)}) (\tilde{P}^{1/2} \otimes I_N) \right\| \end{aligned} \quad (36)$$

where (i) uses the Cauchy-Schwartz inequality and the fact that  $\tilde{P} \otimes I_N \succeq \tilde{A}^T \tilde{A}$ ; (iii) is true for all  $KN \geq 3$ . Inequality (ii) is true due to a result on the spectral norm of the triangular truncation operator; see [1, Theorem 1]. In particular, Define

$$Y_{KN}(D_2) = \max \left\{ \frac{\|Z \odot D_2\|}{\|Z\|} : Z \in \mathbb{R}^{KN \times KN}, Z \neq 0 \right\}.$$

Then we have the following estimate

$$\left| \frac{Y_{KN}(D_2)}{\log(KN)} - \frac{1}{\pi} \right| \leq \left( 1 + \frac{1}{\pi} \right) \frac{1}{\log(KN)}.$$

The proof is completed. **Q.E.D.**

#### 4.2 Proof of Theorem 2.1

**Proof.** For notational simplicity, let us define

$$C := R_0 \log(2NK) \left( L / \sqrt{P_{\min}} + \sqrt{P_{\max}} \right).$$

Taking a square of the cost-to-go estimate (14) and the sufficient descent estimate (12), we obtain

$$\begin{aligned} (\Delta^{(r+1)})^2 &\leq C^2 \left\| (x^{(r+1)} - x^{(r)}) (\tilde{P}^{1/2} \otimes I_N) \right\|^2 \\ &= C^2 \sum_{k=1}^K P_k \|x_k^{(r+1)} - x_k^{(r)}\|^2 \\ &\leq 2C^2 (\Delta^{(r)} - \Delta^{(r+1)}). \end{aligned}$$

Utilizing a result from [2, Lemma 3.5], the above inequality implies that

$$\begin{aligned} \Delta^{(r+1)} &\leq 3 \max \{ \Delta^0, 2C^2 \} \frac{1}{r+1} \\ &\leq 3 \max \left\{ \Delta^0, 2 \log^2(2NK) \left( P_{\max} + \frac{L^2}{P_{\min}} \right) R_0^2 \right\} \frac{1}{r+1} \end{aligned} \quad (37)$$

When  $P_k = L$  for all  $k$ , the bound reduces to

$$\Delta^{(r+1)} \leq 3 \max \{ \Delta^0, 4 \log^2(2NK) R_0^2 L \} \frac{1}{r+1} \quad (38)$$

When the problem is smooth and unconstrained, we have

$$\Delta^{(0)} \leq \langle \nabla f(x^{(0)}), x^{(0)} - x^* \rangle = \langle \nabla f(x^{(0)}) - f(x^*), x^{(0)} - x^* \rangle \leq L \|x^{(0)} - x^*\|^2.$$

This completes the proof. **Q.E.D.**
